# Supplementary material for: Impact of chronic kidney disease on case ascertainment for hospitalised acute myocardial infarction: an English cohort study
Source: HighWire-hosted journal article supplement (doi:10.1136/bmjopen-2021-057909), 2022-03-01
Supplement: bmjopen-2021-057909supp001_data_supplement.pdf [file bmjopen-2021-057909supp001_data_supplement.pdf]

## Supplementary materials

### Supplementary tables

**Supplementary table 1:** ICD-10 codes for AMI identified in HES

**Supplementary table 2:** CALIBER definition of AMI subtypes (STEMI, NSTEMI) using MINAP data.

**Supplementary table 3:** Variables used to define death in-hospital and post-AMI discharge.

**Supplementary table 4:** Details on data sources for covariates.

**Supplementary table 5:** AMI database capture by CKD status (binary) stratified by AMI subtype (STEMI or NSTEMI)

**Supplementary table 6:** Serum creatinine (SCr) measured in the first 24 hours of AMI hospitalization recorded in MINAP, stratified by CKD stage defined in primary care (NCKDA)

**Supplementary table 7:** AMI hospitalisations occurring before study start – description of people in the NCKDA who experienced AMI hospitalisation recorded in MINAP or HES before the study start. n (column %) unless specified otherwise.

**Supplementary table 8:** AMI hospitalisations occurring before study start - multinomial logistic regression comparing the relative risk ratios (RRR) of AMI recording across HES and MINAP according to CKD stage. The comparator outcome is people with AMI recorded in both HES and MINAP databases.

**Supplementary table 9:** AMI hospitalisations occurring before study start - agreement between primary care-derived CKD stage (NCKDA) and secondary care-derived CKD stage (MINAP)

**Supplementary table 10:** Multinomial logistic regression comparing the relative risk ratios (RRR) of AMI recording across HES and MINAP according to CKD stage, after excluding those with a history of dialysis. The comparator outcome is people with AMI recorded in both HES and MINAP databases.

**Supplementary table 11:** Death during and after first AMI hospitalisation in study population at risk of or with CKD, excluding those with a history of dialysis.

**Supplementary table 12:** Sensitivity analysis describing the ICD-10 diagnoses (first episode, first diagnostic position) of non-AMI HES cases that are within  $\pm 30$  days of MINAP only AMI cases from the main analyses

### Supplementary figures

**Supplementary figure 1:** Flow diagram illustrating the NCKDA extracts, and resulting contribution of AMI events to this study

**Supplementary figure 2:** AMI case ascertainment in MINAP and HES datasets over time.

**Supplementary figure 3:** Bland-Altman plot comparing the mean eGFR (NCKDA eGFR and MINAP eGFR, x-axis) and the difference between the NCKDA eGFR and the MINAP eGFR (y-axis).

**Supplementary figure 4:** AMI hospitalisations occurring before study start - comparing AMI case ascertainment overall and by CKD status for AMI hospitalisations in the main analysis and AMI hospitalisations which occurred prior to the last NCKDA extract (sensitivity analysis).

**Supplementary figure 5:** Sensitivity analyses compared to main analysis, describing AMI recording in MINAP and HES in the overall study population at risk of or with CKD. Areas of Venn diagrams are proportional to the number of cases.

**Supplementary table 1:** ICD-10 codes for AMI identified in HES

| <b>AMI subtype</b> | <b>ICD-10 codes</b>                             |
|--------------------|-------------------------------------------------|
| Overall            | I21, I22, I23                                   |
| STEMI              | I21.0, I21.1, I21.2, I21.3, I22.0, I22.1, I22.8 |
| NSTEMI             | I21.4, I21.9, I22.9                             |
| Missing            | I23                                             |

AMI: acute myocardial infarction; HES: Hospital Episode Statistics; ICD-10: International Classification of Diseases 10<sup>th</sup> Edition; STEMI: ST elevated myocardial infarction; NSTEMI: Non-ST elevated myocardial infarction

**Supplementary table 2:** CALIBER definition of AMI subtypes (STEMI, NSTEMI) using MINAP data.

| AMI subtype     | MINAP variable                                                                    |                   |                                                                                     |
|-----------------|-----------------------------------------------------------------------------------|-------------------|-------------------------------------------------------------------------------------|
|                 | Discharge diagnosis                                                               | Markers elevated? | ECG result                                                                          |
| Other           | Threatened MI, Chest pain uncertain cause, MI unconfirmed, other diagnosis        | -                 | -                                                                                   |
| STEMI           | STEMI                                                                             | Raised or missing | ST elevation, LBBB, or ST elevation                                                 |
|                 | NSTEMI/Troponin positive ACS                                                      | Raised or missing | ST elevation                                                                        |
|                 | ACS troponin negative                                                             | Raised            | ST elevation                                                                        |
|                 | ACS troponin unspecified                                                          | Raised            | ST elevation                                                                        |
| NSTEMI          | NSTEMI/Troponin positive ACS                                                      | Raised or missing | ST depression, T wave changes only, other abnormality, Normal ECG, or LBBB          |
|                 | ACS troponin negative                                                             | Raised            | LBBB, ST depression, T wave changes only, Other abnormality, normal ECG, or missing |
|                 | ACS troponin unspecified                                                          | Raised            | LBBB, ST depression, T wave changes only, Other abnormality, normal ECG, or missing |
| Unstable angina | *Any remaining hospitalisations not assigned as STEMI, NSTEMI, or other diagnosis |                   |                                                                                     |

ACS: acute coronary syndrome, AMI: acute myocardial infarction, ECG: electrocardiogram, LBBB: left bundle branch block, MI: myocardial infarction, MINAP: Myocardial Ischaemia National Audit Project, NSTEMI: Non ST-elevation myocardial infarction, STEMI: ST-elevation myocardial infarction

**Supplementary table 3:** Variables used to define death in-hospital and post-AMI discharge.

| <b>Data source</b> | <b>Variables to define in-hospital death</b>                                      | <b>Variables to define death post-AMI discharge (in those who survive first AMI hospitalization)</b> |
|--------------------|-----------------------------------------------------------------------------------|------------------------------------------------------------------------------------------------------|
| ONS                | Date of death (falling on or in between first AMI admission and discharge dates)  | Date of death (falling after first AMI discharge date)                                               |
| MINAP              | Reason for no angiography, no intervention, admission ward, discharge destination | -                                                                                                    |
| HES                | Discharge location, discharge method                                              | -                                                                                                    |

AMI: acute myocardial infarction, HES: Hospital Episode Statistics, MINAP: Myocardial Ischaemia National Audit Project, ONS: Office of National Statistics

**Supplementary table 4:** Details on data sources for covariates.

| Category                                 | Covariate                      | Data source           |
|------------------------------------------|--------------------------------|-----------------------|
| Sociodemographic and lifestyle variables | Age at AMI admission           | NCKDA                 |
|                                          | Sex                            | NCKDA                 |
|                                          | IMD quintiles                  | NCKDA                 |
|                                          | Smoking status                 | NCKDA, MINAP          |
| Comorbidities                            | Angina                         | MINAP and HES         |
|                                          | Cerebrovascular disease        | MINAP and HES         |
|                                          | COPD                           | MINAP and HES         |
|                                          | Diabetes mellitus              | MINAP and HES         |
|                                          | Heart failure                  | MINAP and HES         |
|                                          | Hypertension                   | NCKDA, MINAP, and HES |
|                                          | Previous myocardial infarction | MINAP, and HES        |
|                                          | Peripheral vascular disease    | NCKDA, MINAP, and HES |
|                                          | Dialysis                       | NCKDA                 |
| Kidney transplant                        | NCKDA                          |                       |

AMI: Acute Myocardial Infarction, COPD: Chronic Obstructive Pulmonary Disease, HES: Hospital Episode Statistics, IMD: Index of Multiple Deprivation, NCKDA: National Chronic Kidney Disease Audit, MINAP: Myocardial Ischaemia National Audit Project

**Supplementary table 5:** AMI database capture by CKD status (binary) stratified by AMI subtype (STEMI or NSTEMI)

| AMI subtype | Database (outcome, compared to people with AMI recorded in MINAP & HES) | CKD stage (exposure)        | Number of AMI admissions | Unadjusted RRR (95% CI) | Adjusted RRR <sup>1</sup> (95% CI) |
|-------------|-------------------------------------------------------------------------|-----------------------------|--------------------------|-------------------------|------------------------------------|
| STEMI       | MINAP only<br>(N=115)                                                   | At risk of CKD & Stages 1-2 | 31                       | 1                       | 1                                  |
|             |                                                                         | Stage 3a-5                  | 74                       | 1.08 (0.68-1.72)        | 0.88 (0.52-1.49)                   |
|             | HES only<br>(N=1,482)                                                   | At risk of CKD & Stages 1-2 | 1,306                    | 1                       | 1                                  |
|             |                                                                         | Stage 3a-5                  | 194                      | 0.07 (0.05-0.09)        | 0.07 (0.05-0.09)                   |
| NSTEMI      | MINAP only<br>(N=666)                                                   | At risk of CKD & Stages 1-2 | 167                      | 1                       | 1                                  |
|             |                                                                         | Stage 3a-5                  | 474                      | 1.16 (0.93-1.45)        | 1.11 (0.88-1.41)                   |
|             | HES only<br>(N=2,834)                                                   | At risk of CKD & Stages 1-2 | 2,164                    | 1                       | 1                                  |
|             |                                                                         | Stage 3a-5                  | 717                      | 0.14 (0.12-0.16)        | 0.15 (0.12-0.17)                   |

<sup>1</sup> adjusted for sex, age group at AMI admission, ethnicity, previous AMI, and clustering by patient

AMI: Acute Myocardial Infarction, CKD: chronic kidney disease, HES: Hospital Episode Statistics, MINAP: Myocardial Ischaemia National Audit Project, NSTEMI: non-ST elevation myocardial infarction, RRR: relative risk ratio, STEMI: ST-elevation myocardial infarction

**Supplementary table 6:** Serum creatinine (SCr) measured in the first 24 hours of AMI hospitalization recorded in MINAP, stratified by CKD stage defined in primary care (NCKDA)

| CKD status (NCKDA)          | SCr recorded in MINAP at AMI admission, n (%) | MINAP median SCr, umol (IQR) | MINAP Median SCr value*, mg/dL (IQR) | MINAP Median eGFR, mL/min/1.73m <sup>2</sup> (IQR) |
|-----------------------------|-----------------------------------------------|------------------------------|--------------------------------------|----------------------------------------------------|
| All stages                  | 2,240 (97)                                    | 115 (91-152)                 | 1.30 (1.03-1.72)                     | 47.6 (33.5-61.6)                                   |
| At risk of CKD & Stages 1-2 | 630 (97)                                      | 88 (74-104)                  | 1.00 (0.84-1.18)                     | 67.0 (56.0-80.2)                                   |
| 3a                          | 770 (97)                                      | 109 (94-128)                 | 1.23 (1.06-1.45)                     | 50.8 (41.9-59.2)                                   |
| 3b                          | 587 (98)                                      | 140 (117-174)                | 1.58 (1.32-1.97)                     | 36.7 (29.4-43.4)                                   |
| 4-5                         | 253 (95)                                      | 255 (190-407)                | 2.88 (2.15-4.60)                     | 19.8 (12.0-25.5)                                   |

\*Multiplied by 0.95 for SCr taken before 2013

AMI: acute myocardial infarction, CKD: chronic kidney disease, eGFR: estimated glomerular filtration rate, NCKDA: National Chronic Kidney Disease Audit, MINAP: Myocardial Ischaemia National Audit Project, SCr: serum creatinine



**Supplementary table 7:** AMI hospitalisations occurring before study start – description of people in the NCKDA who experienced AMI hospitalisation recorded in MINAP or HES before the study start. n (column %) unless specified otherwise.

| CKD status<br>(main exposure)             | No CKD               | CKD        |            |          | Total       |
|-------------------------------------------|----------------------|------------|------------|----------|-------------|
| CKD stage<br>(secondary exposure)         | At-risk of CKD & 1-2 | 3a         | 3b         | 4-5      |             |
| <b>Unique individuals</b>                 | 27,909               | 4,884      | 2,083      | 726      | 34,860      |
| <b>Total number of AMI events, N</b>      | 32,041               | 5,641      | 2,460      | 926      | 41,068      |
| <b>Age at AMI event, years, mean (SD)</b> | 64 (13)              | 75 (10)    | 78 (10)    | 75 (12)  | 66 (13)     |
| <b>Age category at AMI event, years</b>   |                      |            |            |          |             |
| 18-50                                     | 4,506 (14)           | 83 (1)     | 22 (1)     | 34 (4)   | 4,645 (11)  |
| 50-64                                     | 11,964 (37)          | 829 (15)   | 207 (8)    | 130 (14) | 13,130 (32) |
| 65-79                                     | 11,517 (36)          | 2,777 (49) | 986 (40)   | 405 (44) | 15,685 (38) |
| 80+                                       | 3,922 (12)           | 1,952 (35) | 1,245 (51) | 357 (39) | 7,476 (18)  |
| Missing                                   | 132 (0)              | 0 (0)      | 0 (0)      | 0 (0)    | 132 (0)     |
| <b>Female</b>                             | 9,288 (29)           | 2,482 (44) | 1,209 (49) | 394 (43) | 13,373 (33) |
| <b>Ethnicity</b>                          |                      |            |            |          |             |
| White                                     | 29,016 (91)          | 5,228 (93) | 2,257 (92) | 846 (91) | 37,347 (91) |
| Other                                     | 2,612 (8)            | 295 (5)    | 139 (6)    | 71 (8)   | 3,117 (8)   |
| Missing                                   | 413 (1)              | 118 (2)    | 64 (3)     | 9 (1)    | 604 (1)     |
| <b>IMD quintile</b>                       |                      |            |            |          |             |
| 1 (least deprived)                        | 5,808 (18)           | 1,121 (20) | 456 (19)   | 184 (20) | 7,569 (18)  |
| 2                                         | 6,716 (21)           | 1,284 (23) | 523 (21)   | 182 (20) | 8,705 (21)  |
| 3                                         | 6,922 (22)           | 1,297 (23) | 542 (22)   | 180 (19) | 8,941 (22)  |
| 4                                         | 6,820 (21)           | 1,134 (20) | 525 (21)   | 216 (23) | 8,695 (21)  |
| 5 (most deprived)                         | 5,531 (17)           | 787 (14)   | 406 (17)   | 161 (17) | 6,885 (17)  |
| Missing                                   | 244 (1)              | 18 (0)     | 8 (0)      | <5       | 273 (1)     |
| <b>Dialysis in primary care</b>           |                      |            |            |          |             |
| Peritoneal dialysis                       | 0 (0)                | 0 (0)      | 0 (0)      | 12 (1)   | 12 (0)      |
| Haemodialysis                             | 0 (0)                | 0 (0)      | 0 (0)      | 24 (3)   | 24 (0)      |
| Renal dialysis, unspecified               | 0 (0)                | 0 (0)      | 0 (0)      | 11 (1)   | 11 (0)      |
| <b>Kidney transplant</b>                  | <5                   | <5         | 8 (0)      | 11 (1)   | 26 (0)      |
| <b>Comorbidities</b>                      |                      |            |            |          |             |
| Angina                                    | 5,001 (16)           | 1,630 (29) | 882 (36)   | 335 (36) | 7,848 (19)  |
| Cerebrovascular disease                   | 1,405 (4)            | 497 (9)    | 309 (13)   | 135 (15) | 2,346 (6)   |

| CKD status<br>(main exposure)        | No CKD               | CKD        |            |          | Total       |
|--------------------------------------|----------------------|------------|------------|----------|-------------|
| CKD stage<br>(secondary exposure)    | At-risk of CKD & 1-2 | 3a         | 3b         | 4-5      |             |
| <b>Unique individuals</b>            | 27,909               | 4,884      | 2,083      | 726      | 34,860      |
| <b>Total number of AMI events, N</b> | 32,041               | 5,641      | 2,460      | 926      | 41,068      |
| COPD                                 | 2,059 (6)            | 680 (12)   | 368 (15)   | 147 (16) | 3,254 (8)   |
| Diabetes                             | 5,823 (18)           | 1,500 (27) | 873 (35)   | 463 (50) | 8,659 (21)  |
| Heart failure                        | 1,228 (4)            | 456 (8)    | 353 (14)   | 199 (21) | 2,236 (5)   |
| Hypertension                         | 10,556 (33)          | 3,287 (58) | 1,721 (70) | 673 (73) | 16,237 (40) |
| Myocardial infarction                | 5,563 (17)           | 1,510 (27) | 832 (34)   | 380 (41) | 8,285 (20)  |
| Peripheral vascular disease          | 799 (2)              | 258 (5)    | 181 (7)    | 106 (11) | 1,344 (3)   |
| <b>Smoking status</b>                |                      |            |            |          |             |
| non-smoker                           | 12,945 (40)          | 2,049 (36) | 835 (34)   | 301 (33) | 16,130 (39) |
| ever-smoker                          | 16,626 (52)          | 2,477 (44) | 983 (40)   | 382 (41) | 20,468 (50) |
| Missing                              | 2,470 (8)            | 1,115 (20) | 642 (26)   | 243 (26) | 4,470 (11)  |

AMI: Acute Myocardial Infarction, CKD: chronic kidney disease, COPD: Chronic Obstructive Pulmonary Disease, HES: Hospital Episode Statistics, IMD: Index of Multiple Deprivation, NCKDA: National Chronic Kidney Disease Audit, MINAP: Myocardial Ischaemia National Audit Project

**Supplementary table 8:** AMI hospitalisations occurring before study start - multinomial logistic regression comparing the relative risk ratios (RRR) of AMI recording across HES and MINAP according to CKD stage. The comparator outcome is people with AMI recorded in both HES and MINAP databases.

| AMI recording<br>(outcome, compared<br>to people with AMI<br>recorded in MINAP &<br>HES) | CKD stage<br>(exposure) | Number of AMI<br>admissions, n= | Unadjusted <sup>1</sup> RRR (95%<br>CI) | Partially adjusted <sup>2</sup> RRR<br>(95% CI) | Adjusted <sup>3</sup> RRR (95% CI) |
|------------------------------------------------------------------------------------------|-------------------------|---------------------------------|-----------------------------------------|-------------------------------------------------|------------------------------------|
| <b>MINAP only</b><br>(N=3,957)                                                           | At-risk/Stages 1-2      | 2,147                           | 1                                       | 1                                               | 1                                  |
|                                                                                          | Stage 3a                | 999                             | 0.96 (0.87-1.05)                        | 0.90 (0.82-0.99)                                | 0.88 (0.80-0.97)                   |
|                                                                                          | Stage 3b                | 578                             | 1.22 (1.09-1.36)                        | 1.12 (0.99-1.26)                                | 1.05 (0.93-1.19)                   |
|                                                                                          | Stages 4-5              | 233                             | 1.35 (1.14-1.60)                        | 1.27 (1.07-1.51)                                | 1.13 (0.94-1.35)                   |
| <b>HES only</b><br>(N=26,697)                                                            | At-risk/Stages 1-2      | 23,904                          | 1                                       | 1                                               | 1                                  |
|                                                                                          | Stage 3a                | 1,911                           | 0.16 (0.15-0.18)                        | 0.23 (0.22-0.25)                                | 0.24 (0.22-0.25)                   |
|                                                                                          | Stage 3b                | 630                             | 0.12 (0.11-0.13)                        | 0.20 (0.17-0.22)                                | 0.21 (0.18-0.23)                   |
|                                                                                          | Stages 4-5              | 252                             | 0.13 (0.11-0.15)                        | 0.18 (0.15-0.22)                                | 0.20 (0.17-0.24)                   |

<sup>1</sup>Complete cases for adjusted model

<sup>2</sup>Adjusted for sex, age at AMI admission, ethnicity (white, other), IMD quintile, clustering by participant

<sup>3</sup>Additionally adjusted for comorbidities previous AMI, heart failure, COPD, diabetes mellitus

AMI: Acute Myocardial Infarction, CKD: chronic kidney disease, COPD: Chronic Obstructive Pulmonary Disease, HES: Hospital Episode Statistics, IMD: Index of Multiple Deprivation, MINAP: Myocardial Ischaemia National Audit Project, RRR: relative risk ratio

**Supplementary table 9:** AMI hospitalisations occurring before study start - agreement between primary care-derived CKD stage (NCKDA) and secondary care-derived CKD stage (MINAP)

|                                                                                                                            | % agreement | Kappa statistic (SE) |
|----------------------------------------------------------------------------------------------------------------------------|-------------|----------------------|
| <b>Overall<sup>1</sup></b>                                                                                                 | 66.4%       | 0.51 (0.007)         |
| <b>CKD stages 3a, 3b, 4-5<sup>2</sup></b>                                                                                  | 57.8%       | 0.37 (0.008)         |
| <b>CKD stages 1-2, 3a-5<sup>3</sup></b>                                                                                    | 80.3%       | 0.59 (0.010)         |
| <b>Overall<sup>1</sup>, by time from NCKDA SCr test (primary care) to MINAP SCr test (at AMI secondary care admission)</b> |             |                      |
| 0-5 months                                                                                                                 | 66.7%       | 0.52 (0.009)         |
| 6-11 months                                                                                                                | 65.6%       | 0.49 (0.013)         |
| 12-23 months                                                                                                               | 63.3%       | 0.42 (0.023)         |
| 24-36 months                                                                                                               | 65.0%       | 0.45 (0.034)         |

<sup>1</sup>Overall agreement when grouping as (1) Stages 1-2 (eGFR 60-120mL/min/1.73m<sup>2</sup>), (2) Stage 3a (eGFR 45-59mL/min/1.73m<sup>2</sup>), (3) Stage 3b (eGFR 30-44 mL/min/1.73m<sup>2</sup>), (4) Stages 4-5 (eGFR 0-30 mL/min/1.73m<sup>2</sup>)

<sup>2</sup>Agreement when restricting to people with CKD stages 3a-5, grouped as (1) Stage 3a (eGFR 45-59mL/min/1.73m<sup>2</sup>), (2) Stage 3b (eGFR 30-44 mL/min/1.73m<sup>2</sup>), (3) Stages 4-5 (eGFR 0-30 mL/min/1.73m<sup>2</sup>)

<sup>3</sup>Agreement when grouping as (1) Stages 1-2 (eGFR 60-120mL/min/1.73m<sup>2</sup>) and (2) Stages 3a-5 (eGFR 0-59mL/min/1.73m<sup>2</sup>)

AMI: Acute Myocardial Infarction, CKD: chronic kidney disease, NCKDA: National Chronic Kidney Disease Audit, MINAP: Myocardial Ischaemia National Audit Project, SCr: serum creatinine

**Supplementary table 10:** Multinomial logistic regression comparing the relative risk ratios (RRR) of AMI recording across HES and MINAP according to CKD stage, after excluding those with a history of dialysis. The comparator outcome is people with AMI recorded in both HES and MINAP databases.

| AMI recording<br>(outcome, compared<br>to people with AMI<br>recorded in MINAP &<br>HES) | CKD stage<br>(exposure) | Number of AMI<br>admissions, n= | Unadjusted <sup>1</sup> RRR (95%<br>CI) | Partially adjusted <sup>2</sup> RRR<br>(95% CI) | Adjusted <sup>3</sup> RRR (95% CI) |
|------------------------------------------------------------------------------------------|-------------------------|---------------------------------|-----------------------------------------|-------------------------------------------------|------------------------------------|
| <b>MINAP only</b><br>(N=731)                                                             | At-risk/Stages 1-2      | 196                             | 1                                       | 1                                               | 1                                  |
|                                                                                          | Stage 3a                | 245                             | 1.07 (0.85-1.34)                        | 0.98 (0.77-1.25)                                | 0.98 (0.77-1.25)                   |
|                                                                                          | Stage 3b                | 197                             | 1.17 (0.92-1.49)                        | 1.04 (0.80-1.36)                                | 1.03 (0.79-1.35)                   |
|                                                                                          | Stages 4-5              | 93                              | 1.54 (1.14-1.60)                        | 1.41 (1.01-1.97)                                | 1.36 (0.97-1.92)                   |
| <b>HES only</b><br>(N=4,353)                                                             | At-risk/Stages 1-2      | 3,456                           | 1                                       | 1                                               | 1                                  |
|                                                                                          | Stage 3a                | 557                             | 0.14 (0.12-0.16)                        | 0.14 (0.12-0.17)                                | 0.14 (0.12-0.16)                   |
|                                                                                          | Stage 3b                | 224                             | 0.08 (0.06-0.09)                        | 0.08 (0.07-0.10)                                | 0.08 (0.06-0.10)                   |
|                                                                                          | Stages 4-5              | 116                             | 0.11 (0.08-0.14)                        | 0.12 (0.09-0.15)                                | 0.12 (0.09-0.16)                   |

<sup>1</sup>Complete cases for adjusted model

<sup>2</sup>Adjusted for sex, age at AMI admission, ethnicity (white, other), IMD quintile, clustering by participant

<sup>3</sup>Additionally adjusted for comorbidities previous AMI, heart failure, COPD, diabetes mellitus

AMI: Acute Myocardial Infarction, CKD: chronic kidney disease, COPD: Chronic Obstructive Pulmonary Disease, HES: Hospital Episode Statistics, IMD: Index of Multiple Deprivation, MINAP: Myocardial Ischaemia National Audit Project, RRR: relative risk ratio

**Supplementary table 11:** Death during and after first AMI hospitalisation in study population at risk of or with CKD, excluding those with a history of dialysis.

| <b>Death during first AMI hospitalisation (N=5,919)<sup>1</sup></b>                                         | <b>Number who died, n (%)</b>              | -                                         | <b>Unadjusted OR (95% CI)</b> | <b>Adjusted<sup>2</sup> OR (95% CI)</b> |
|-------------------------------------------------------------------------------------------------------------|--------------------------------------------|-------------------------------------------|-------------------------------|-----------------------------------------|
| MINAP & HES                                                                                                 | 208 (15)                                   | -                                         | 1                             | 1                                       |
| MINAP only                                                                                                  | 148 (23)                                   | -                                         | 1.65 (1.31-2.09)              | 1.59 (1.25-2.03)                        |
| HES only                                                                                                    | 575 (15)                                   | -                                         | 0.97 (0.82-1.15)              | 1.61 (1.32-1.96)                        |
| <b>Death during complete follow-up in those who survive first AMI hospitalisation (N=5,009)<sup>1</sup></b> | <b>Number who died during follow-up, n</b> | <b>Rate per 100 person-years (95% CI)</b> | <b>Unadjusted HR (95% CI)</b> | <b>Adjusted<sup>2</sup> HR (95% CI)</b> |
| MINAP & HES                                                                                                 | 445                                        | 17.5 (16.0-19.2)                          | 1                             | 1                                       |
| MINAP only                                                                                                  | 234                                        | 23.4 (20.6-26.6)                          | 1.30 (1.11-1.52)              | 1.14 (0.97-1.34)                        |
| HES only                                                                                                    | 841                                        | 10.3 (9.58-11.0)                          | 0.61 (0.54-0.68)              | 1.09 (0.96-1.24)                        |

<sup>1</sup>Complete cases for adjusted model<sup>2</sup>Adjusted for sex, age at AMI admission, ethnicity (white, other), IMD quintile, previous AMI, heart failure, COPD, diabetes mellitus

AMI: Acute Myocardial Infarction, CKD: chronic kidney disease, COPD: Chronic Obstructive Pulmonary Disease, HES: Hospital Episode Statistics, HR: hazard ratio, IMD: Index of Multiple Deprivation, NCKDA: National Chronic Kidney Disease Audit, MINAP: Myocardial Ischaemia National Audit Project, OR: odds ratio

**Supplementary table 12:** Sensitivity analysis describing the ICD-10 diagnoses (first episode, first diagnostic position) of non-AMI HES cases that are within  $\pm 30$  days of MINAP only AMI cases from the main analyses

| <b>Main analysis</b>                                                                  |                                      |                         |
|---------------------------------------------------------------------------------------|--------------------------------------|-------------------------|
| <b>MINAP only AMI hospitalisations matched with non-AMI HES hospitalisations</b>      |                                      | 677/766 (88%)           |
| <b>Short ICD-10 code (1<sup>st</sup> episode, 1<sup>st</sup> diagnostic position)</b> |                                      | <b>n (% of matched)</b> |
| I24                                                                                   | Other acute ischaemic heart diseases | 114 (17)                |
| I25                                                                                   | Chronic ischaemic heart disease      | 84 (12)                 |
| R07                                                                                   | Pain in throat and chest             | 63 (9)                  |
| J18                                                                                   | Pneumonia, organism unspecified      | 56 (8)                  |
| I20                                                                                   | Angina pectoris                      | 51 (8)                  |
| I50                                                                                   | Heart failure                        | 39 (6)                  |
| S72                                                                                   | Fracture of femur                    | 18 (3)                  |
| N39                                                                                   | Other disorders of urinary system    | 14 (2)                  |
| A41                                                                                   | Other sepsis                         | 11 (2)                  |
| R06                                                                                   | Abnormalities of breathing           | 11 (2)                  |
| <b>Sensitivity analysis – AMI hospitalisations occurring before study start</b>       |                                      |                         |
| <b>MINAP only AMI hospitalisations matched with non-AMI HES hospitalisations</b>      |                                      | 3,908/4,470 (87%)       |
| <b>Short ICD-10 code (1<sup>st</sup> episode, 1<sup>st</sup> diagnostic position)</b> |                                      | <b>n (% of matched)</b> |
| I25                                                                                   | Chronic ischaemic heart disease      | 996 (25)                |
| I20                                                                                   | Angina pectoris                      | 760 (19)                |
| R07                                                                                   | Pain in throat and chest             | 588 (15)                |
| I24                                                                                   | Other acute ischaemic heart diseases | 271 (7)                 |
| I50                                                                                   | Heart failure                        | 129 (3)                 |

|     |                                 |        |
|-----|---------------------------------|--------|
| J18 | Pneumonia, organism unspecified | 86 (2) |
| I48 | Atrial fibrillation and flutter | 73 (2) |
| R06 | Abnormalities of breathing      | 49 (1) |
| I46 | Cardiac arrest                  | 42 (1) |
| S72 | Fracture of femur               | 40 (1) |

AMI: Acute Myocardial Infarction, HES: Hospital Episode Statistics, ICD-10: International Classification of Diseases – 10<sup>th</sup> Edition, MINAP: Myocardial Ischaemia National Audit Project



**Supplementary figure 1:** Flow diagram illustrating the NCKDA extracts, and resulting contribution of AMI events to this study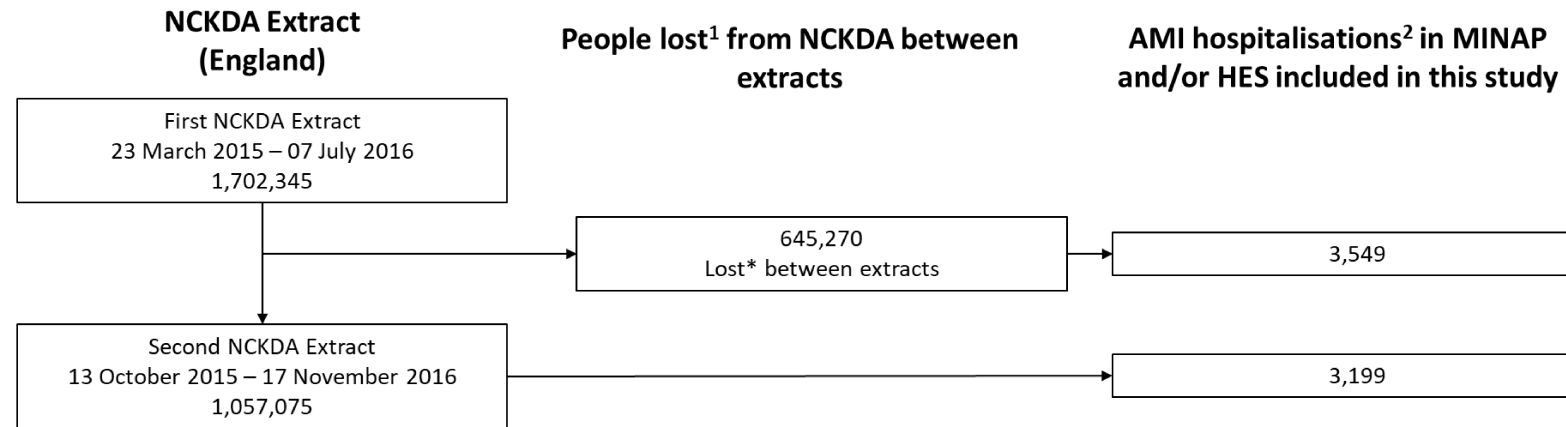

<sup>1</sup>Lost due to death, GP opted out, or person moved GPs

<sup>2</sup>AMI hospitalisations occurring after final NCKDA extract in which each person appears

AMI: acute myocardial infarction, GP: General Practice, NCKDA: National Chronic Kidney Disease Audit, MINAP: Myocardial Ischaemia National Audit Project

**Supplementary figure 2: AMI case ascertainment in MINAP and HES datasets over time.**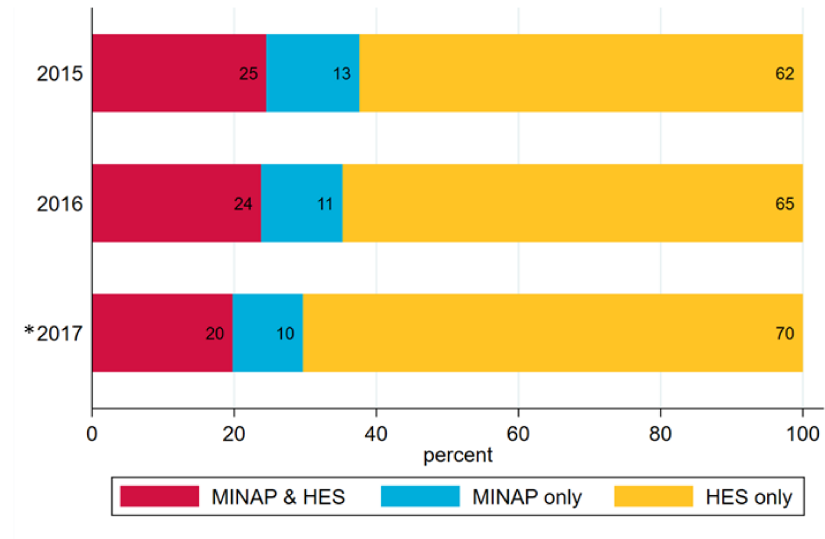

\*2017 includes AMI hospitalisations up to 31 March only

AMI: acute myocardial infarction, HES: Hospital Episode Statistics, MINAP: Myocardial Ischaemia National Audit Project

**Supplementary figure 3:** Bland-Altman plot comparing the mean eGFR (NCKDA eGFR and MINAP eGFR, x-axis) and the difference between the NCKDA eGFR and the MINAP eGFR (y-axis).

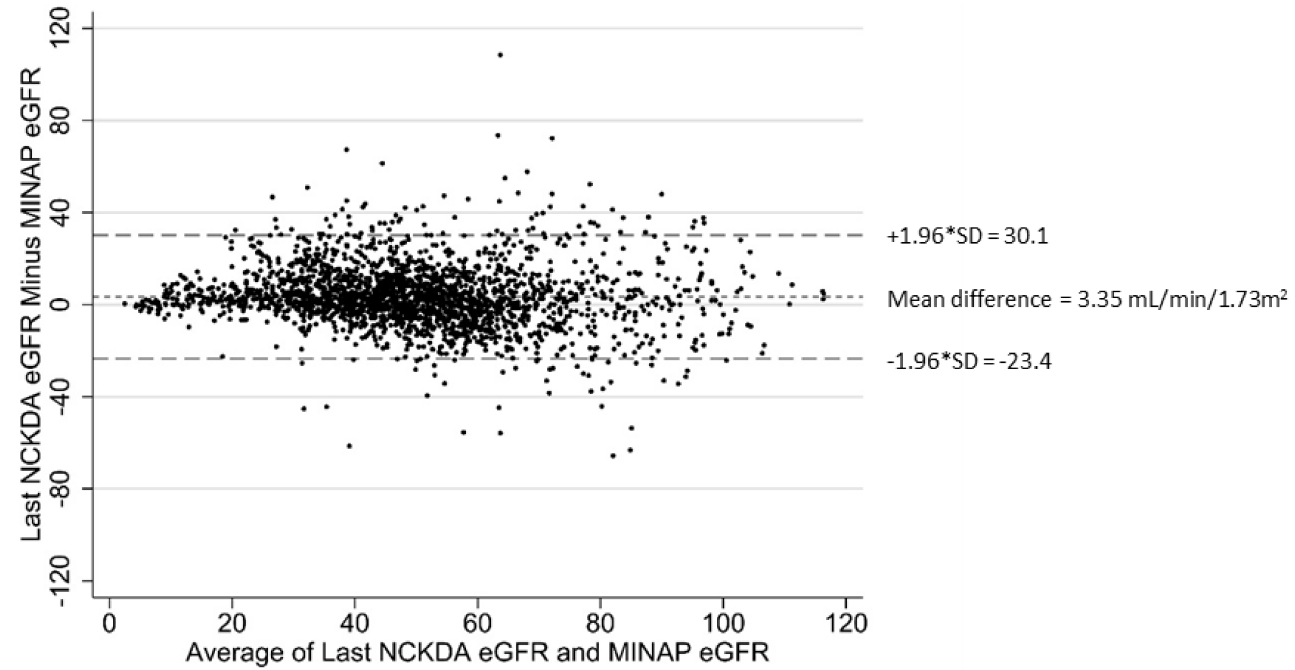

eGFR: estimated glomerular filtration rate, NCKDA: National Chronic Kidney Disease Audit, MINAP: Myocardial Ischaemia National Audit Project

**Supplementary figure 4:** AMI hospitalisations occurring before study start - comparing AMI case ascertainment overall and by CKD status for AMI hospitalisations in the main analysis and AMI hospitalisations which occurred prior to the last NCKDA extract (sensitivity analysis).

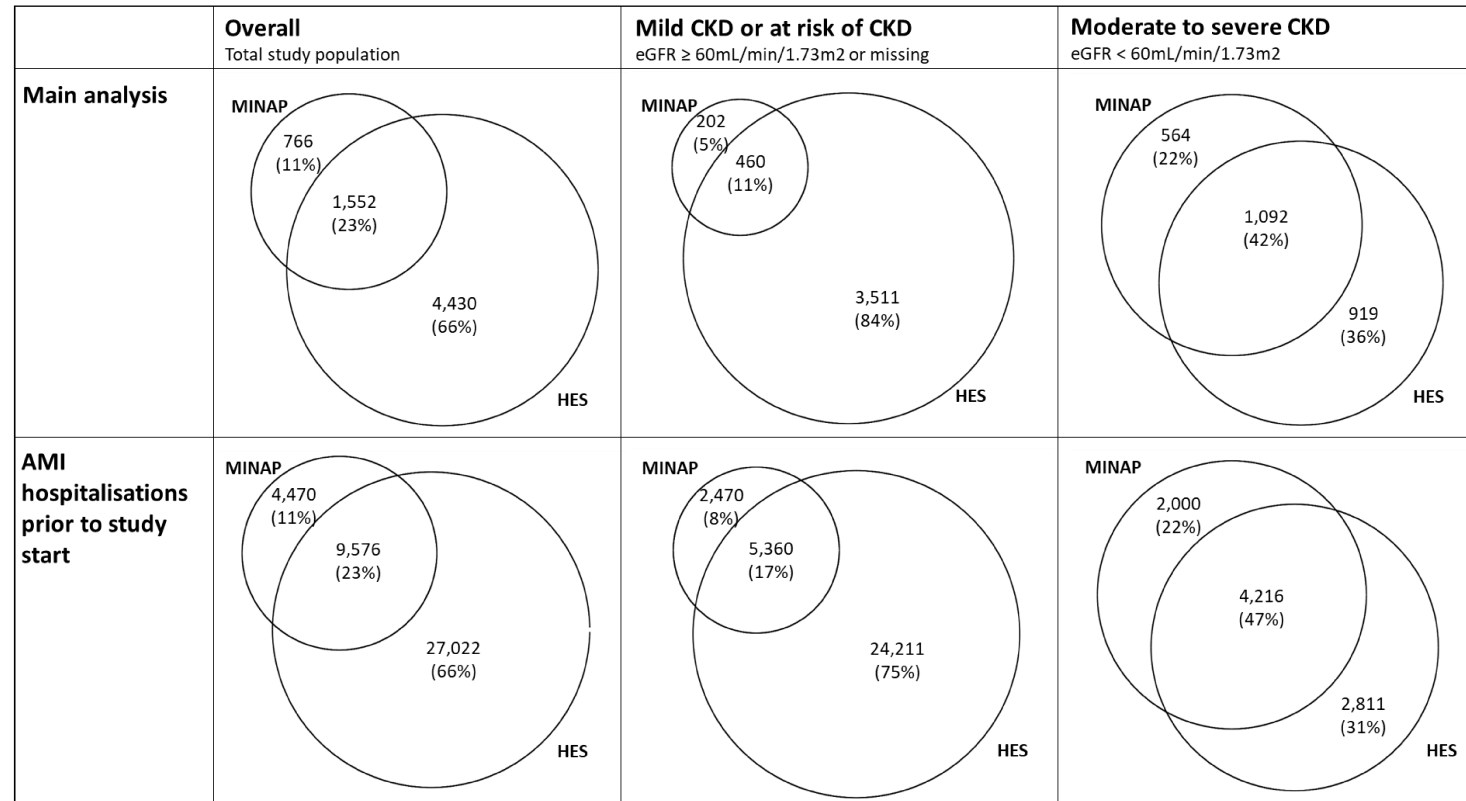

AMI: Acute Myocardial Infarction, CKD: chronic kidney disease, eGFR: estimated glomerular filtration rate, NCKDA: National Chronic Kidney Disease Audit, MINAP: Myocardial Ischaemia National Audit Project

**Supplementary figure 5:** Sensitivity analyses compared to main analysis, describing AMI recording in MINAP and HES in the overall study population at risk of or with CKD. Areas of Venn diagrams are proportional to the number of cases.

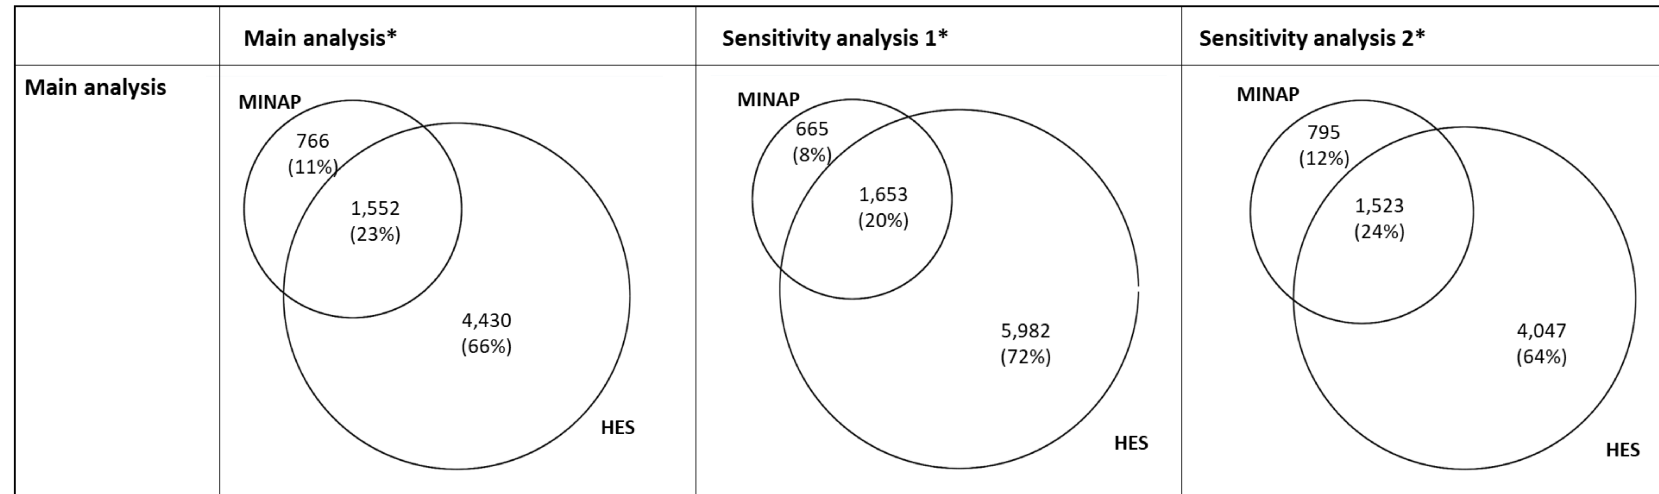

\***Main analysis:** HES AMI cases defined as AMI recorded in 1<sup>st</sup> diagnostic position, 1<sup>st</sup> episode of hospitalisation

\***Sensitivity analysis 1:** HES AMI cases defined as AMI recorded in 1<sup>st</sup> or 2<sup>nd</sup> diagnostic position, 1<sup>st</sup> episode of hospitalisation

\***Sensitivity analysis 2:** HES AMI cases in 1<sup>st</sup> diagnostic position, 1<sup>st</sup> episode of hospitalisation (as per main analysis) within 30 days of each other counted as a single AMI case, then matched to MINAP AMI cases

AMI: Acute Myocardial Infarction, CKD: chronic kidney disease, HES: Hospital Episode Statistics, MINAP: Myocardial Ischaemia National Audit Project
